# Supplementary material
Source: Springer Nature journal article supplement (https://www.springermedizin.de/resource/supplementary/13045_2013_345_MOESM5_ESM.pdf/9661174)
Supplement: MOESM5 [file 9661174]

A

A

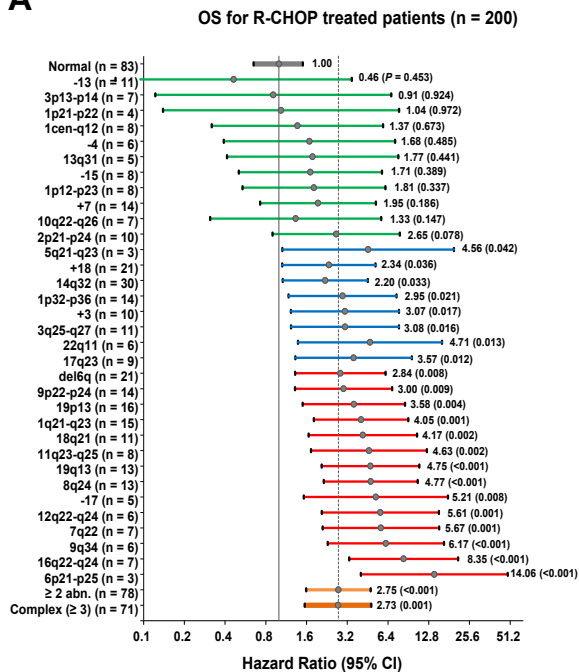

B

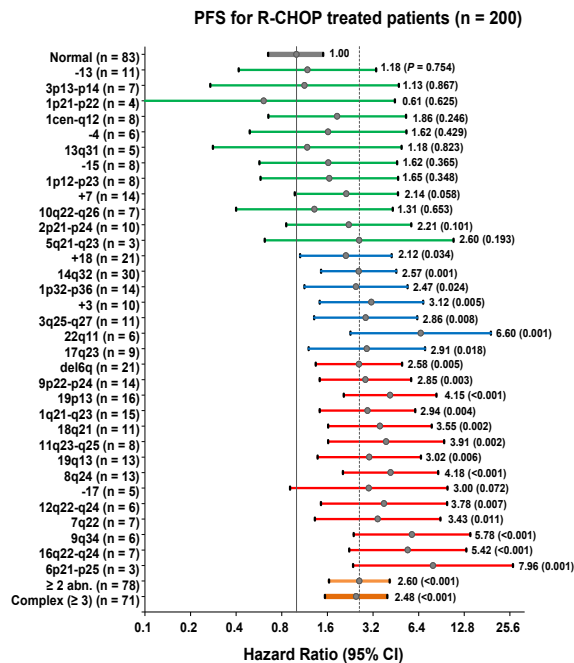

**Supplementary Figure S4.** Forest plots showing hazard ratios (HRs) obtained by univariate Cox analysis for **(A)** overall survival (OS) and **(B)** progression-free survival (PFS) according to the presence of specific chromosomal abnormalities using patients with lymphoma bone marrow involvement and normal karyotype as a reference group in R-CHOP-treated patients having either abnormal karyotypes or histologic BM involvement (n = 200).
